# Supplementary material for: circPTPN22 as a novel biomarker and ceRNA in peripheral blood mononuclear cells of rheumatoid arthritis
Source: PubMed Central journal article supplement — Mol Med Rep. 2021 Jun 29;24(2):617. doi: 10.3892/mmr.2021.12256 (PMC8258470; doi:10.3892/mmr.2021.12256), 2021-06-29

Figure S1. Violin plots show the normalized intensity distribution for all datasets in samples. FPKM, fragments per kilobase per million; RA, rheumatoid arthritis; HC, healthy controls.

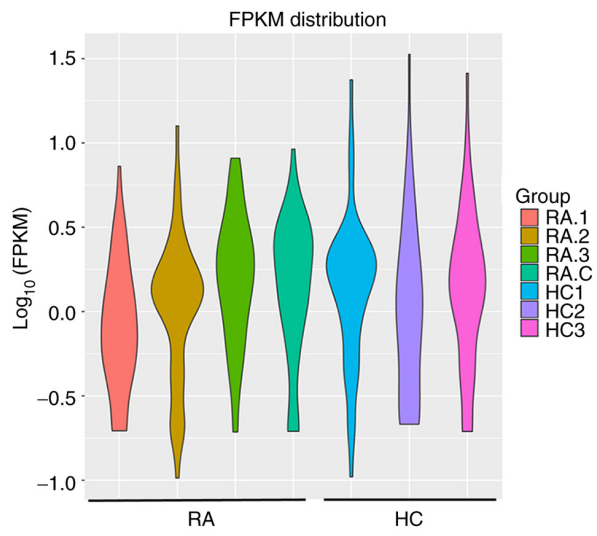

Figure S2. The expression level of *PTPN22* and correlation of expression levels between circ*PTPN22* and *PTPN22* mRNA. (A) The expression levels of *PTPN22* in PBMCs of RA patients, SLE patients and HCs were determined by reverse transcription-quantitative PCR. (B) Pearson's correlation test of circ*PTPN22* and *PTPN22* levels in PBMCs of RA patients. \* $P < 0.05$ , \*\* $P < 0.01$ , \*\*\* $P < 0.001$ . circRNA, circular RNA; PBMCs, peripheral blood mononuclear cells; RA, rheumatoid arthritis; SLE, systemic lupus erythematosus; HC, healthy controls.

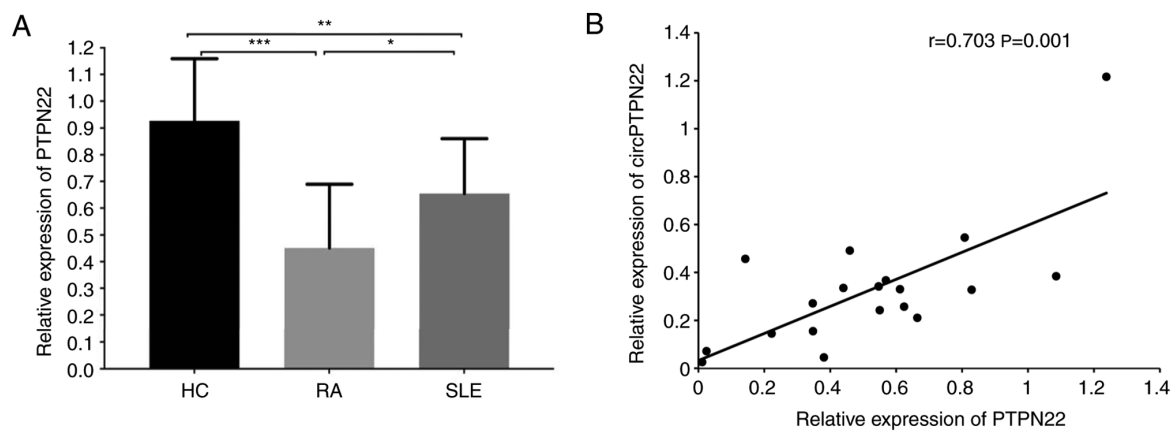

Supplement: Supplementary_Data3.pdf [file Supplementary_Data3.pdf]
